# Supplementary material for: Lake toxin concentrations increase when phosphorus is reduced
Source: Research Square preprint supplement (doi:10.21203/rs.3.rs-4328909/v1), 2024-05-09
Supplement: Supplementary file 1 [file 749dd6227b948f44ddd0c6e6.docx]

**Supplementary information for:**

**Lake toxin concentrations increase when phosphorus is reduced**

**Authors:** Charlotte Schampera1, Thomas Niemeyer1, Julia Pries1, Ferdi L. Hellweger1, *

**Affiliation:**

1 Water Quality Engineering, Technical University of Berlin, Berlin, Germany

*Corresponding author

Ferdi L. Hellweger

Water Quality Engineering

Technical University of Berlin

Sekr. KF 4

Straße des 17. Juni 135

10623 Berlin / Germany

phone: +49 (0)30 314-25847

email: [ferdi.hellweger@tu-berlin.de](mailto:ferdi.hellweger@tu-berlin.de)

**Materials and Methods**

*Literature review on laboratory studies*

Studies investigating the effect of varying nitrogen concentration or irradiance on MC quota were catalogued by Hellweger et al. (*17 in main paper*). Abbreviations in our figure 1 of the main paper are from that study and indicate authors initial and year (e.g.WO75 is Watanabe and Oishi, 1975). The two-fold-change (i.e. logarithm to the base of two - log2 of ratio) of lowest to highest value (above zero) was calculated. In cases of time-series data, only the last data-point was considered. In cases of other altered condition (e.g. varying phosphorus concentrations, temperatures etc.) or various strains investigated, the average of all measurements were used (i.e. each point corresponds to one study and may be the average of several individual experiments). For light condition, environmentally relevant ranges of irradiances were included (i.e. if several high light intensities were measured, irradiances below 200 µmol photons/m2/s were used).

*Literature review on field data*

A strategic literature review on cyanotoxin concentration measurements in lakes with phosphorus reduction (listed in reference number *8* in main paper) was performed using the web-based search platforms “GoogleScholar”, “Web of Science” and “Google Search”. The combination of “Lake name” and “cyanotoxin/cyanobacteria/microcystin” was applied. Furthermore, references of (*8 in main paper*) were audited. Lakes were grouped in the categories “no data”, “single data points” and “time-series data” (i.e. > 3 datapoints in one blooming season).

*Analysis national lakes assessment*

The NLA survey from the Environmental Protection Agency (EPA) is conducted in the United States of America to strategically sample lakes, reservoirs and ponds for common limnological data in the years 2007, 2012 and 2017. For methodology of sampling and analyses refer to the Field and Lab Manual ([Manuals Used in the National Aquatic Resource Surveys | US EPA](https://www.epa.gov/national-aquatic-resource-surveys/manuals-used-national-aquatic-resource-surveys#National%20Lakes%20Assessment)). Data were extracted from the website ([Data from the National Aquatic Resource Surveys | US EPA](https://www.epa.gov/national-aquatic-resource-surveys/data-national-aquatic-resource-surveys)) and processed with Phyton and Excel. In some cases, two sampling events were performed in one year but in different weeks or months. In those cases, all sampling events were included in the analyses and treated as individual data point. If the sampling was repeated at the same day, the average of both measurements was used for the analysis. Note that we tested our results using different approach of handling data of two sampling events in one year but different weeks/months. For instance, we used the average or the higher value of the two sampling. In all approaches the analyses show the same trend, only differing in magnitude, supporting the robustness of our results.

The dataset was filtered for cases with detected concentrations of MCs. For all parameter the change among sampling events were calculated for each lake using two-fold-change (log2). Hereby, data show proportional change of a parameter rather than absolute change. For instance, in 2007 a microcystin (MC) concentration of 0.3 and in 2012 of 0.66 was measured in Cedar Creek Reservoir 9-A. The fold change is 1.14 (i.e. ), the parameter has more than doubled. Correlation analyses were performed for changes in TP and changes in the parameters chlorophyll a (Chla), dissolved inorganic nitrogen (DIN), turbidity, MC per biomass (MC/Chla) and MC concentration. Spearman rank correlation tests were performed in RStudio (R4.3.2) with the *dplyr* package.

**Additional results and discussion**

The dataset with all time pairs were split into two groups of dual nutrient reduction and phosphorus only reduction, whereas the latter group was further divided into cases which are phosphorus limited and not phosphorus limited (see main paper, figure 2). In the following, these groups are discussed individually.

Figure S1 shows the analysis of all time pairs. Across all time pairs, a reduction in TP concentrations result in a decrease in biomass (panel A). The change in dissolved inorganic nitrogen does not correlate with changes in TP concentrations (panel B1). With reduced TP concentration, also turbidity is reduced (panel B2) which matches the reduction in biomass. The MC concentration per biomass increased with reduced TP concentrations, showing a variable phytoplankton stoichiometry. MC concentration does not change with TP concentrations. The dashed line shows the change proportionally to biomass.

In fig. S2, the analysis of the group with dual nutrient reduction is shown. Changes in TP concentrations correlate positively with changes in biomass (panel A), available nitrogen (panel B1) and light (panel B2). MC per biomass (panel C) show a slight increase with reduced TP whereas MC concentrations (panel D) reduce along with biomass. This group is defined by a reduction of total phosphorus and total nitrogen. Therefor it is reasonable that also DIN concentrations decrease along with TP and biomass which is the opposite trend than in a phosphorus only reduction discussed in the main paper. Although more light was available, the reduced available nitrogen resulted in less production of additional MC and subsequently no change in the *Microcystis* community towards the toxigenic strain may have occurred. Although a slight increase of MC per biomass is evident, probably due to a slight increase of MC production because of higher light availability, MC concentrations decrease with lower TP.

In fig. S3, the group of phosphorus only reduction with all time pairs is shown. In this group, no correlation of changes in TP and biomass was evident (panel A). DIN (panel B1), turbidity (panel B2), MC/biomass (panel C) and MC concentrations (panel D) correlate negatively with changes in TP concentration. The group consists of several lakes which are either phosphorus limited (see discussion in the main paper) or which are not phosphorus limited (see next paragraph).

In fig. S4, the analysis of the group which experiences phosphorus only reduction but which is not phosphorus limited is shown. Here, biomass increased with reduced TP concentrations (panel A). No correlation of changes in TP with changes in DIN was evident (panel B1) whereas turbidity increased with reduced TP concentrations (panel B2), matching the changes in biomass. As no additional nitrogen and less light was available with reduced phosphorus, no change in MC per biomass was observed (panel C). MC concentrations increased with reduced TP concentrations proportional to biomass (panel D). This observation is consistent with the mechanism discussed in the main paper: if no additional nitrogen and light is available, no additional MC molecules can be produced.

**Fig. S1:** *Analysis of all time pairs*. Data (dots) and their regression lines are shown for the National Lakes Assessment (NLA) survey depicted as change between sampling times. Each point represents the fold change (log2 of ratio) of one parameter for different survey years in the same lake. Note, a few data points are out of figure scaling. Spearman rank correlation tests were performed. A phosphorus only reduction would move a lake from right to left on the x-axis. Correlation of changes in TP concentration and changes in biomass (panel A), DIN concentrations (panel B1), turbidity (panel B2), MC per biomass (C) and MC concentrations (D) are shown.

**Fig. S2:** *Analysis of the group with dual nutrient reduction*. For description see fig. S1.

**Fig. S3:** *Analysis of the group with a phosphorus only reduction, all time pairs*. For description see fig. S1.

**Fig. S4:** *Analysis of the group with a phosphorus only reduction which are not phosphorus limited*. For description see fig. S1.
